# Supplementary material for: Hidden impacts of ocean warming and acidification on biological responses of marine animals revealed through meta-analysis
Source: PubMed Central journal article supplement (PMC10991405; doi:10.1038/s41467-024-47064-3), 2024-04-03
Supplement: 41467_2024_47064_MOESM1_ESM.pdf [file 41467_2024_47064_MOESM1_ESM.pdf]

## Supplementary material

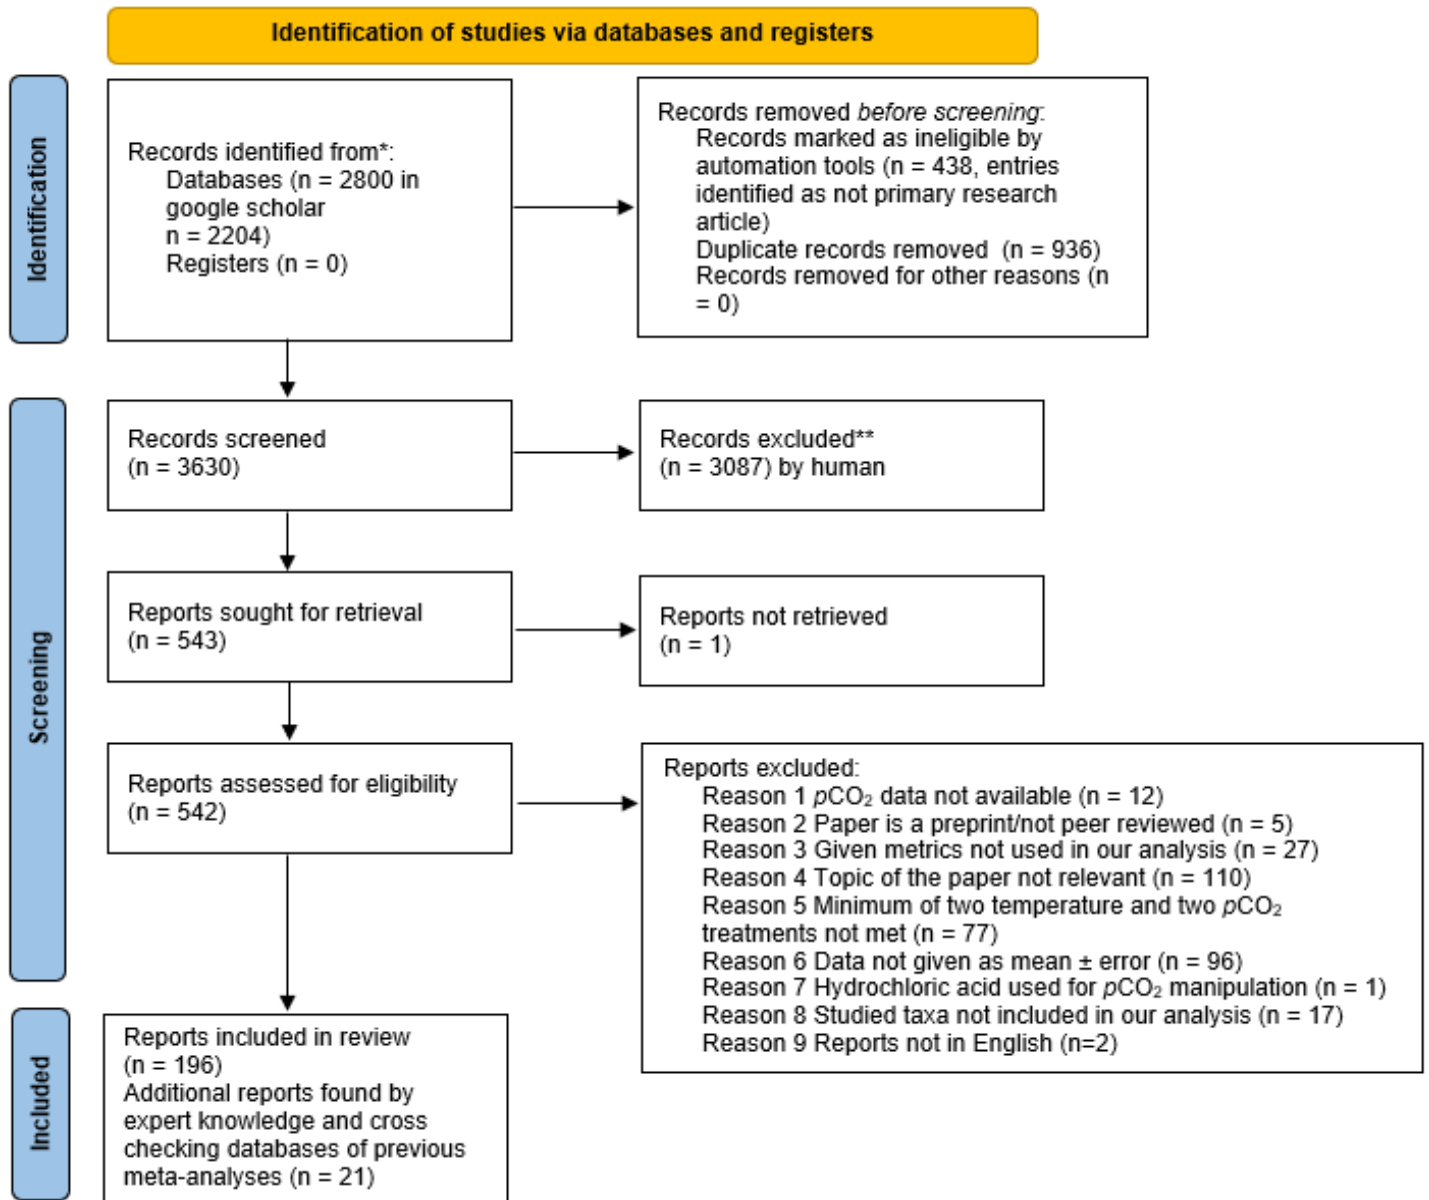

Supplementary Fig. 1: PRISMA flow diagram of the systematic review process of this study. This figure was based on the template provided in Page et al.<sup>59</sup>.

## directional response

## deviational response

experimental – control  $p\text{CO}_2$  value (as given in publications)

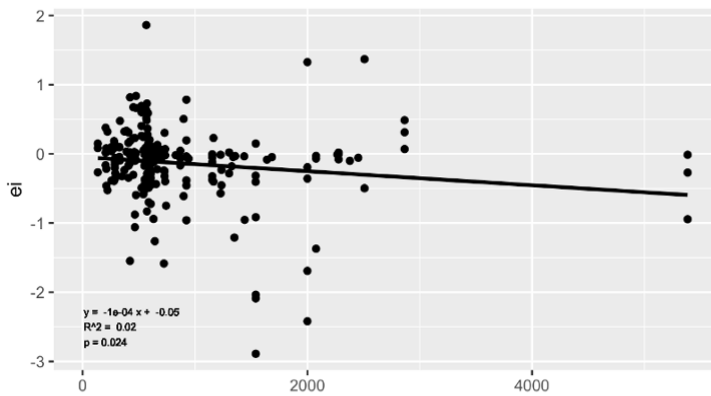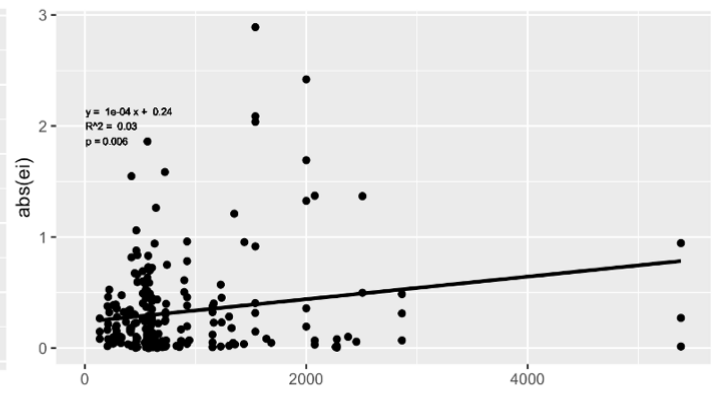

experimental – extreme local environmental  $p\text{CO}_2$

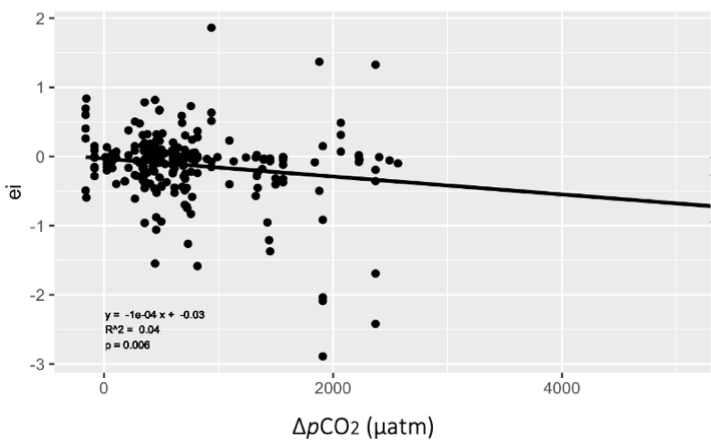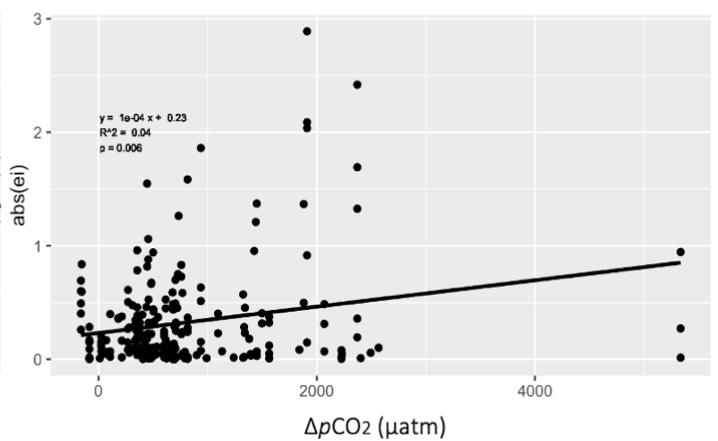

Supplementary Fig. 2: Correlation of biological responses of invertebrates to the intensity of experimental ocean acidification treatments. Directional (lnRR; left panels) and deviational ((abs(lnRR)); right panels) responses of invertebrates to the intensity of experimental ocean acidification treatments ( $\Delta p\text{CO}_2$ ,  $\mu\text{atm}$ ) were either calculated by using treatment and control  $p\text{CO}_2$  values as given by authors in publications (top panels) or by using extreme local environmental  $p\text{CO}_2$  as the control value (bottom panels), following Vargas et al.<sup>46</sup>. The intercept and the coefficient of the linear regression is indicated on plots, along with the R-squared and the p-value associated with the fit of the linear regression to the data set.

# Directional responses

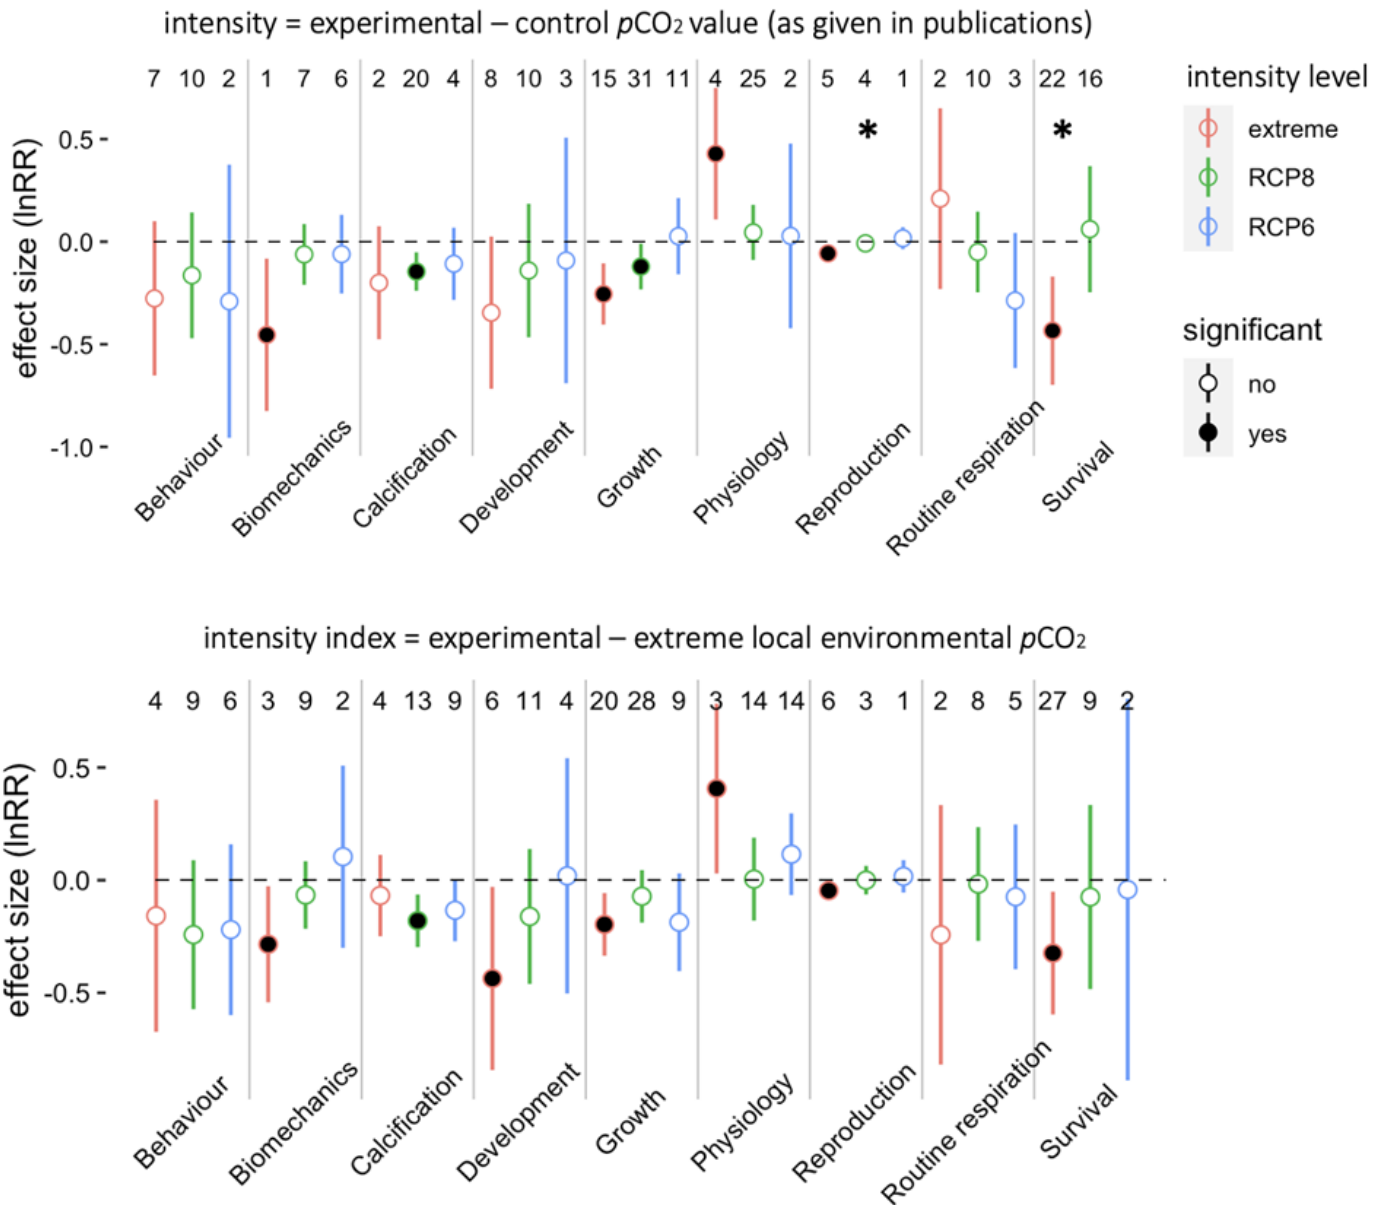

Supplementary Fig. 3: Directional responses (lnRR) of invertebrates to ocean acidification across biological responses at different intensity levels. In the top panel, intensity levels were determined using treatment and control  $p\text{CO}_2$  values as given by authors in publications. In the bottom panel, intensity levels were determined using extreme local environmental  $p\text{CO}_2$  as control values, following Vargas et al.<sup>46</sup>. Effect sizes are considered significant when 95% confidence intervals do not overlap zero. Significant effect sizes are displayed with black fills, while non-significant effect sizes have white fills. Significant differences between effect sizes for different intensity levels within a biological response is denoted by an *asterisk*. Sample sizes are indicated above effect sizes.

# Deviational responses

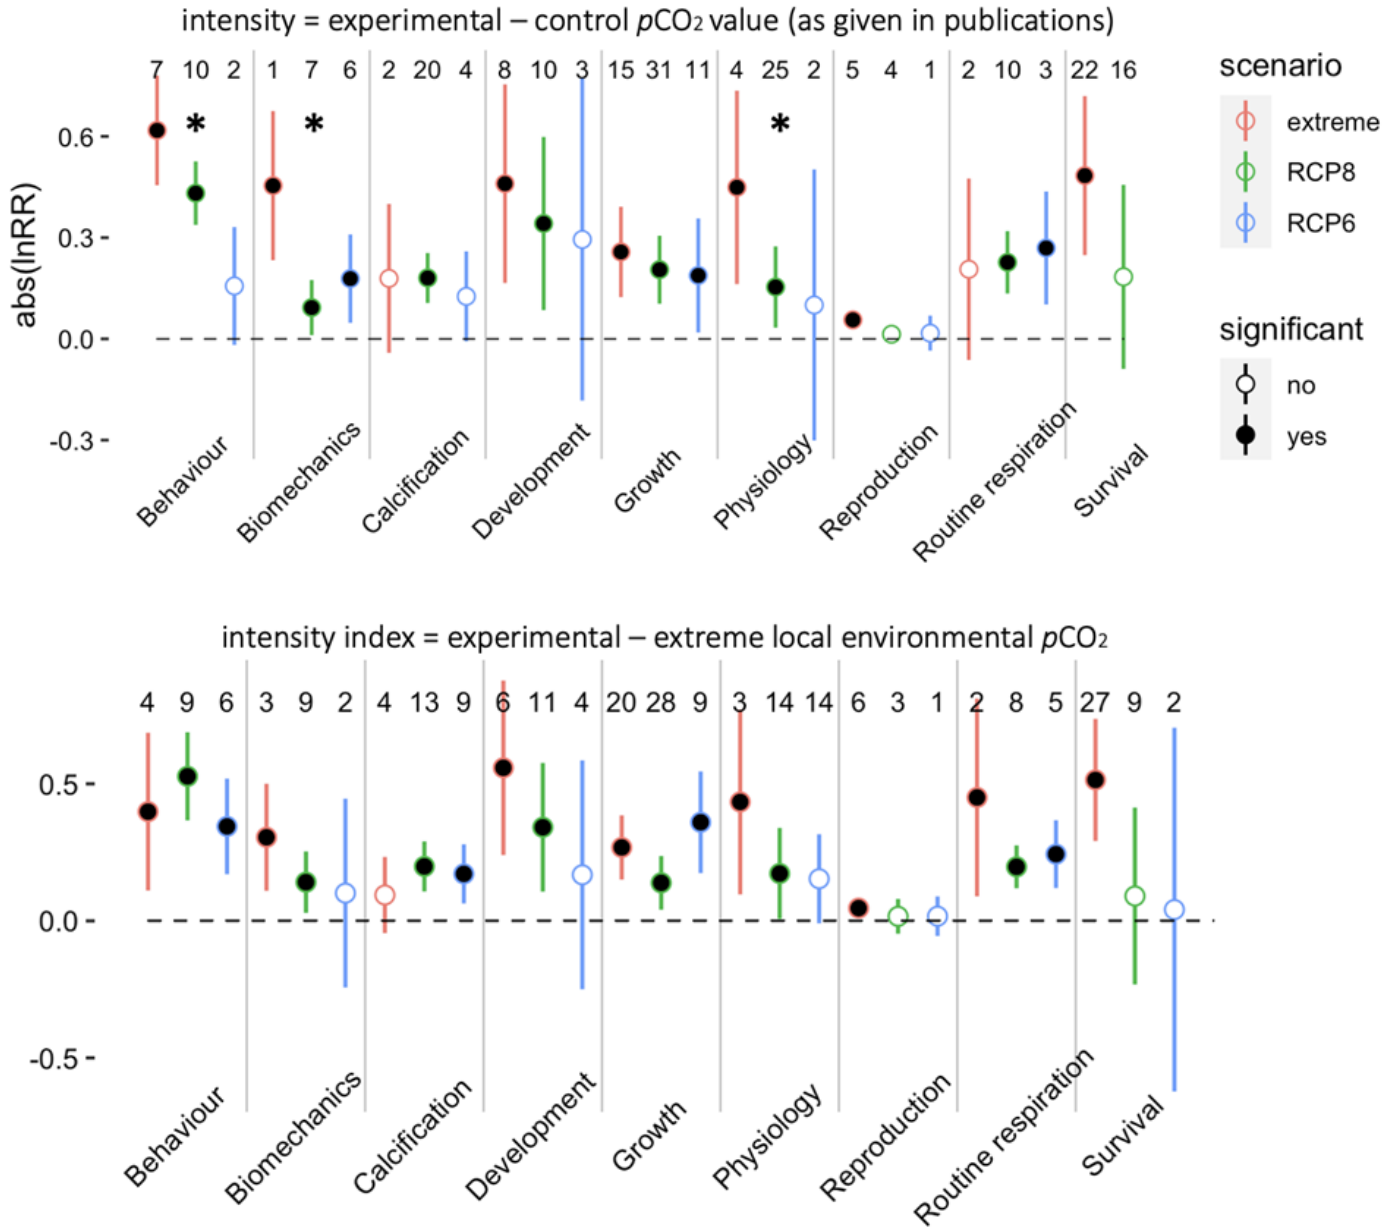

Supplementary Fig. 4: Deviological responses ( $\text{abs}(\ln\text{RR})$ ) of invertebrates to ocean acidification across biological responses at different intensity levels. In the top panel, intensity levels were determined using treatment and control  $p\text{CO}_2$  values as given by authors in publications. In the bottom panel, intensity levels were determined using extreme local environmental  $p\text{CO}_2$  as control values, following Vargas et al.<sup>46</sup>. Effect sizes are considered significant when 95% confidence intervals do not overlap zero. Significant effect sizes are displayed with black fills, while non-significant effect sizes have white fills. Significant differences between effect sizes for different intensity levels within a biological response is denoted by an *asterisk*. Sample sizes are indicated above effect sizes.

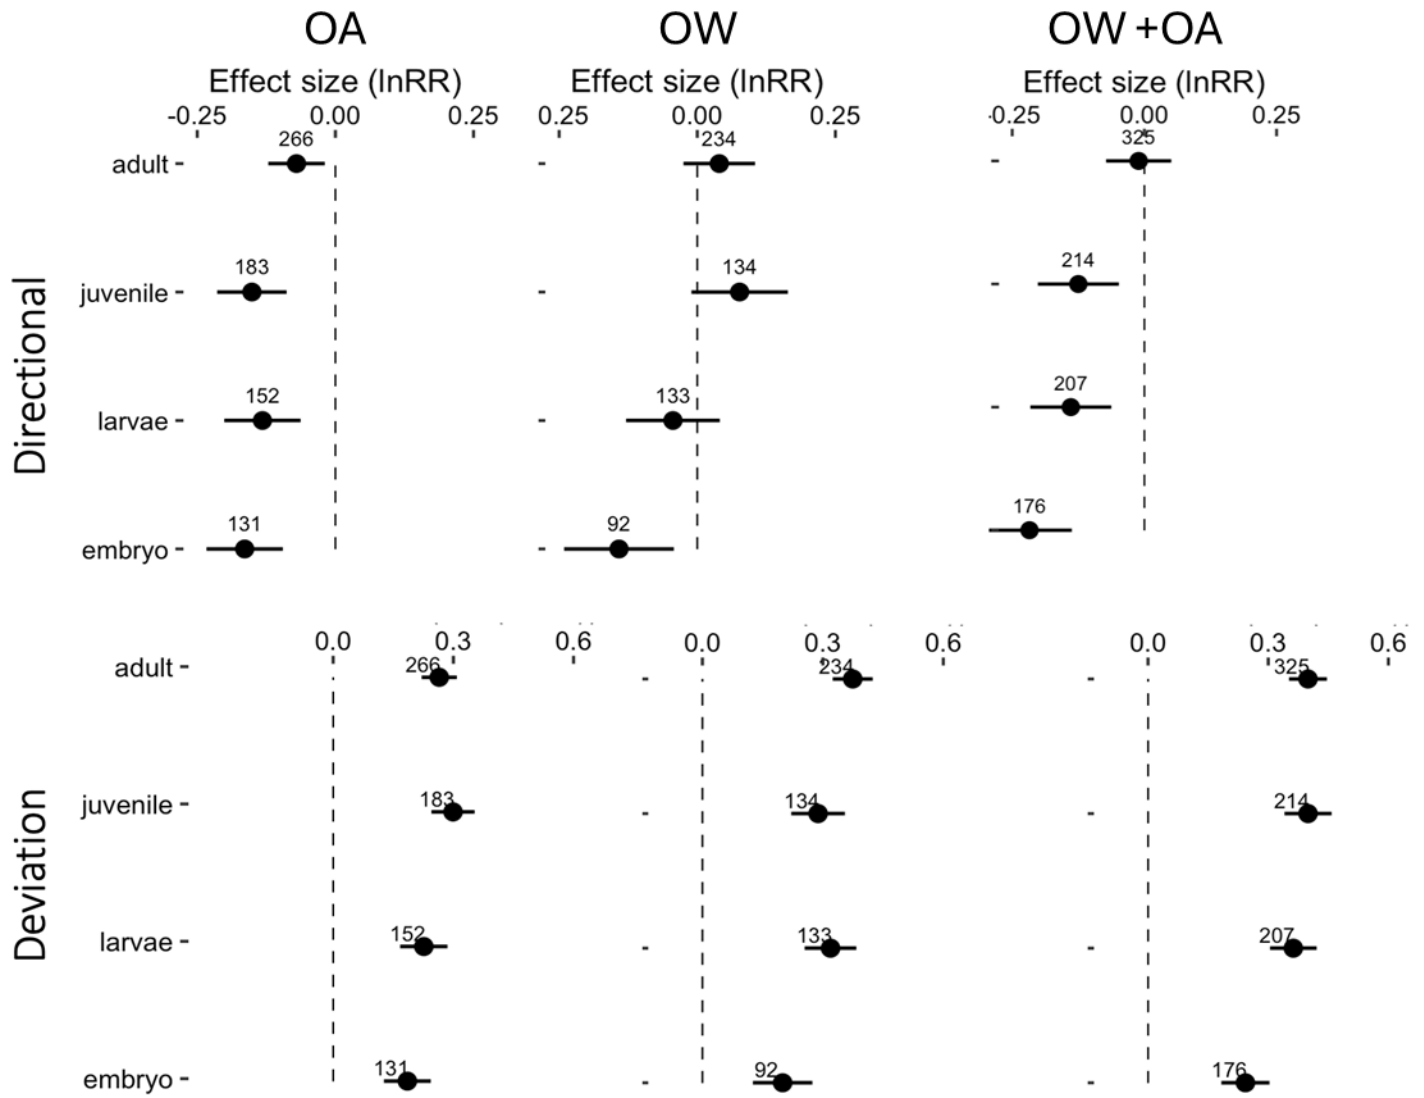

Supplementary Fig. 5: Biological response of invertebrates across life stages to climate drivers. Top panels display directional responses (lnRR) and bottom panels display deviational responses (abs(lnRR)) to ocean acidification (OA), ocean warming (OW) and their combination (OW + OA). Dots and bars represent mean effect size and their associated 95% confidence interval (CI). Numbers indicate the sample size (number of experiments) associated with each effect size. Effect sizes are considered significant when their 95% CI does not overlap zero (hashed lines).

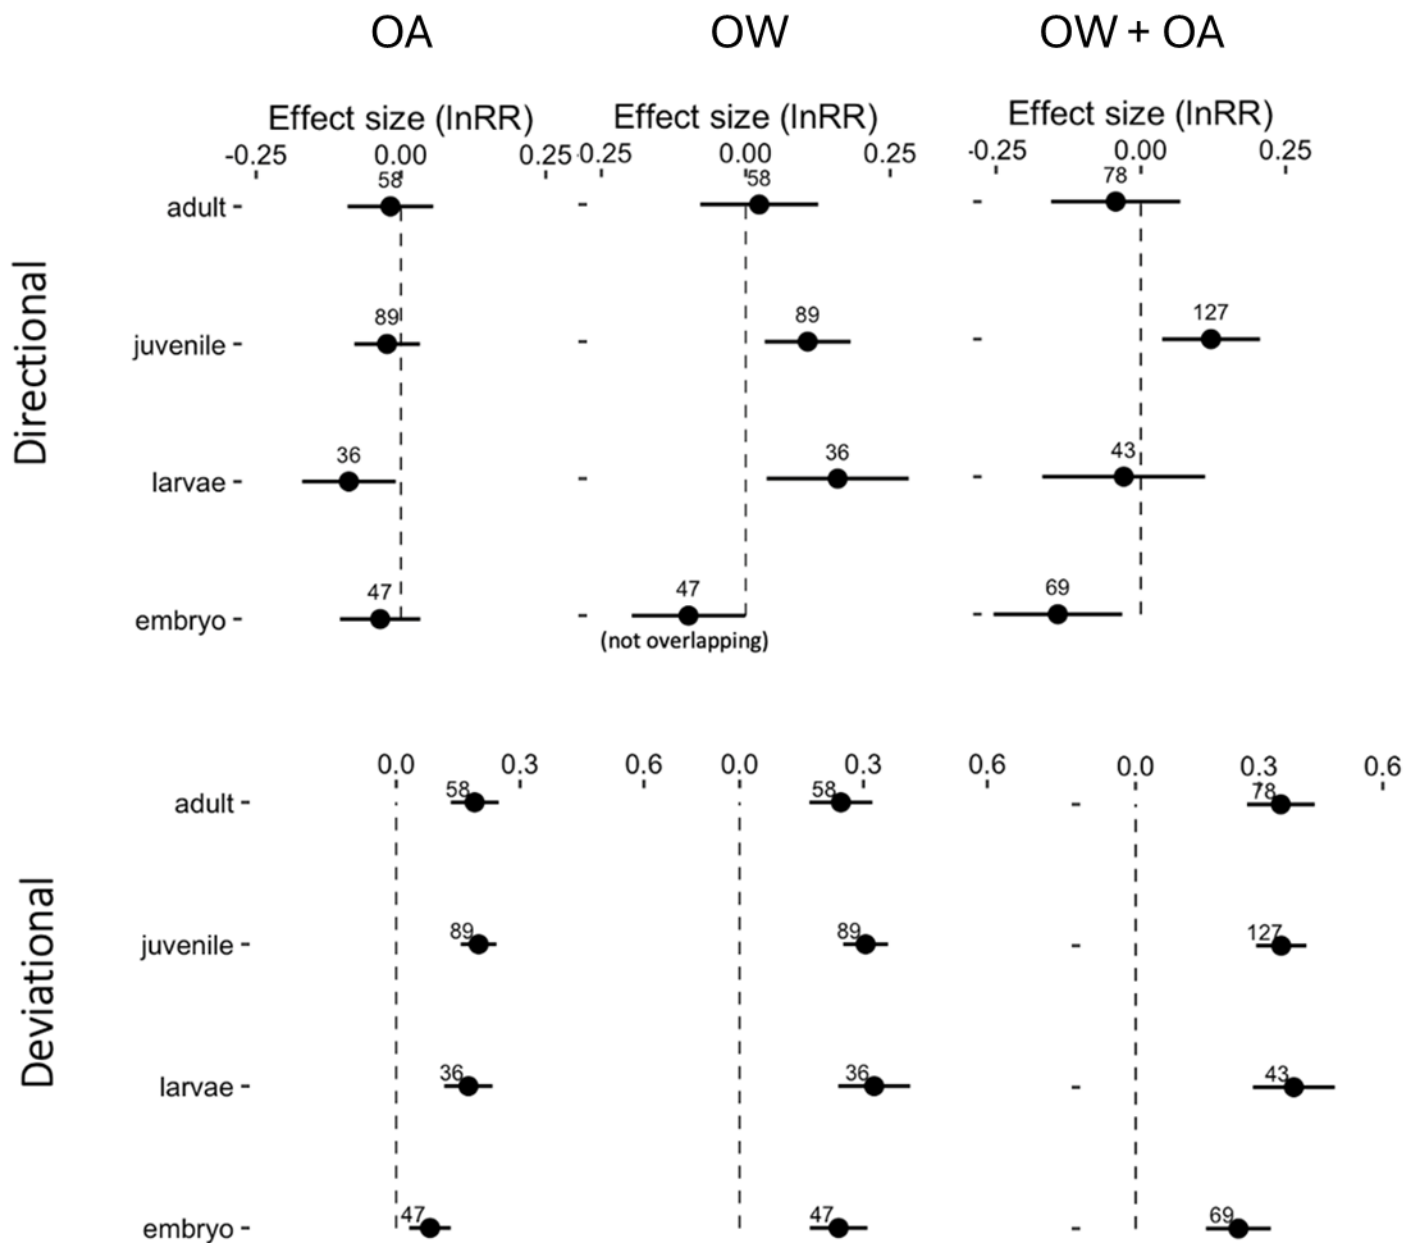

Supplementary Fig. 6: Biological responses of fish across life stages to climate drivers. Top panels display directional responses (lnRR) and bottom panels display deviational responses (abs(lnRR)) to ocean acidification (OA), ocean warming (OW) and their combination (OW + OA). Dots and bars represent mean effect size and their associated 95% confidence interval (CI). Numbers indicate the sample size (number of experiments) associated with each effect size. Effect size are considered significant when their 95% CI does not overlap zero (hashed lines).

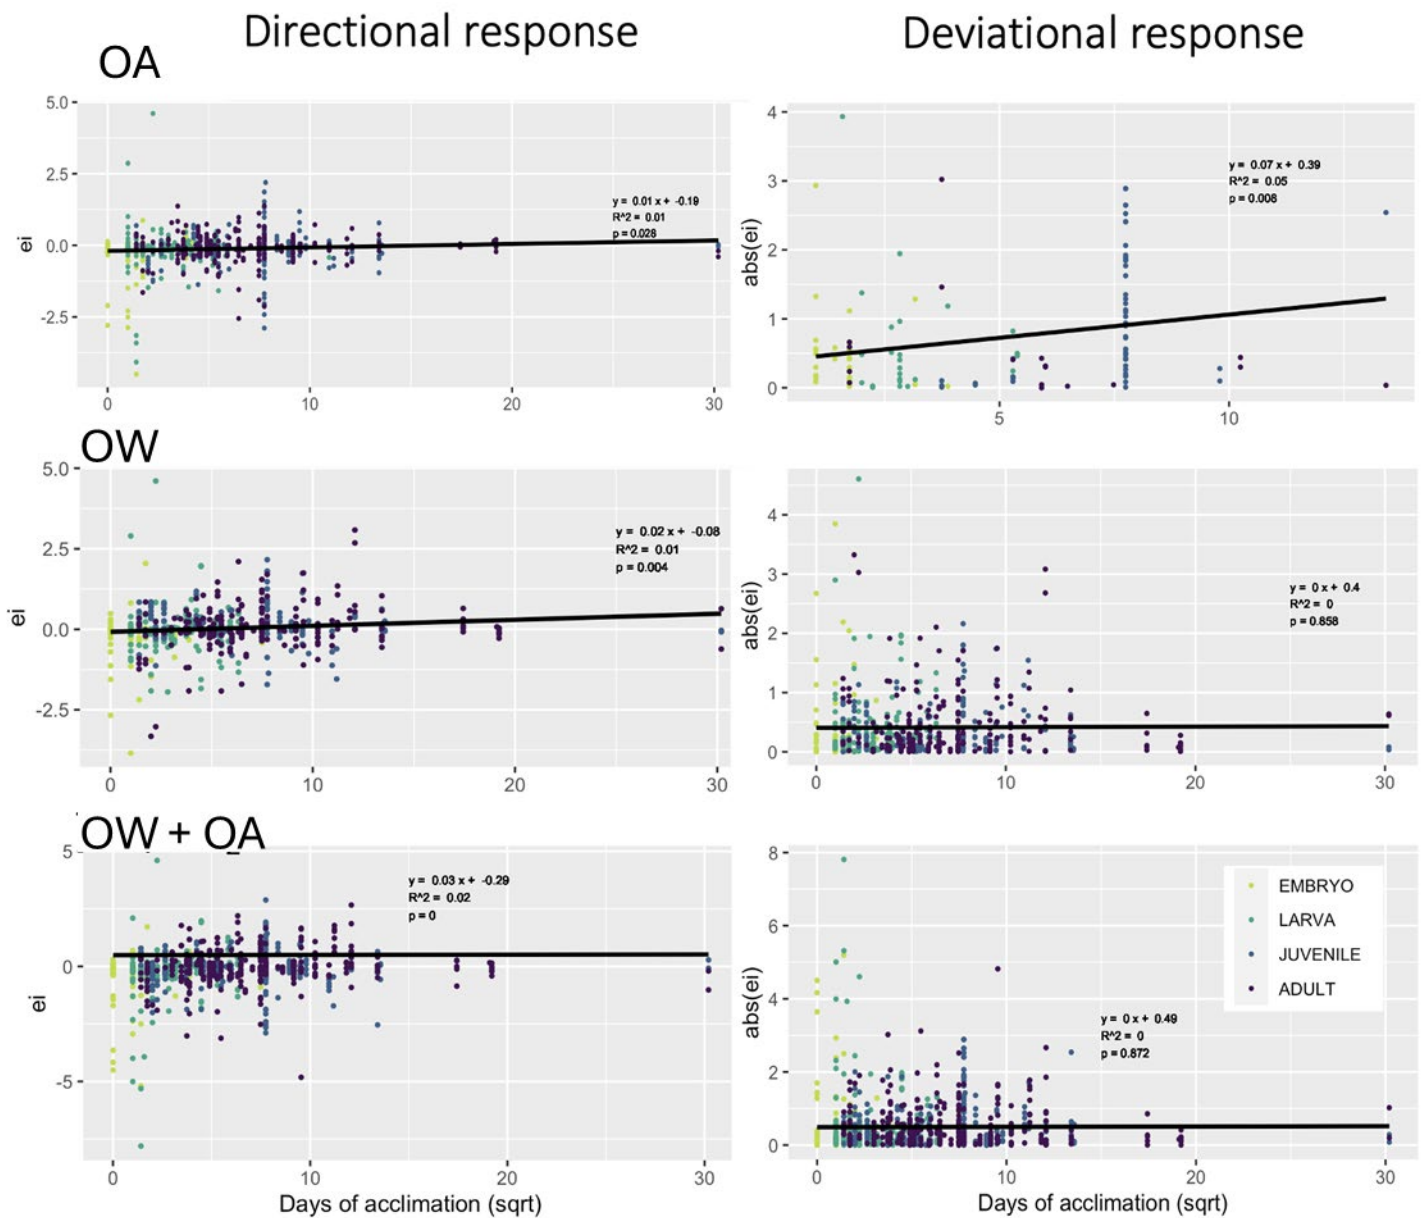

Supplementary Fig. 7: Effect of the number of acclimation days in experiments on the biological responses of invertebrates to climate drivers. Left plots display directional responses (lnRR) and right plots deviational responses (abs(lnRR)) to ocean acidification (OA; top panel), ocean warming (OW; middle panel) and their combination (OW + OA; bottom panel). The color of dots, which each represent the effect size associated with individual experiments, indicates the life stage of the organism tested (embryo, larva, juvenile, and adult). The intercept and the coefficient of the linear regression is indicated on plots, along with the R-squared and the p-value associated with the fit of the linear regression to the data set.

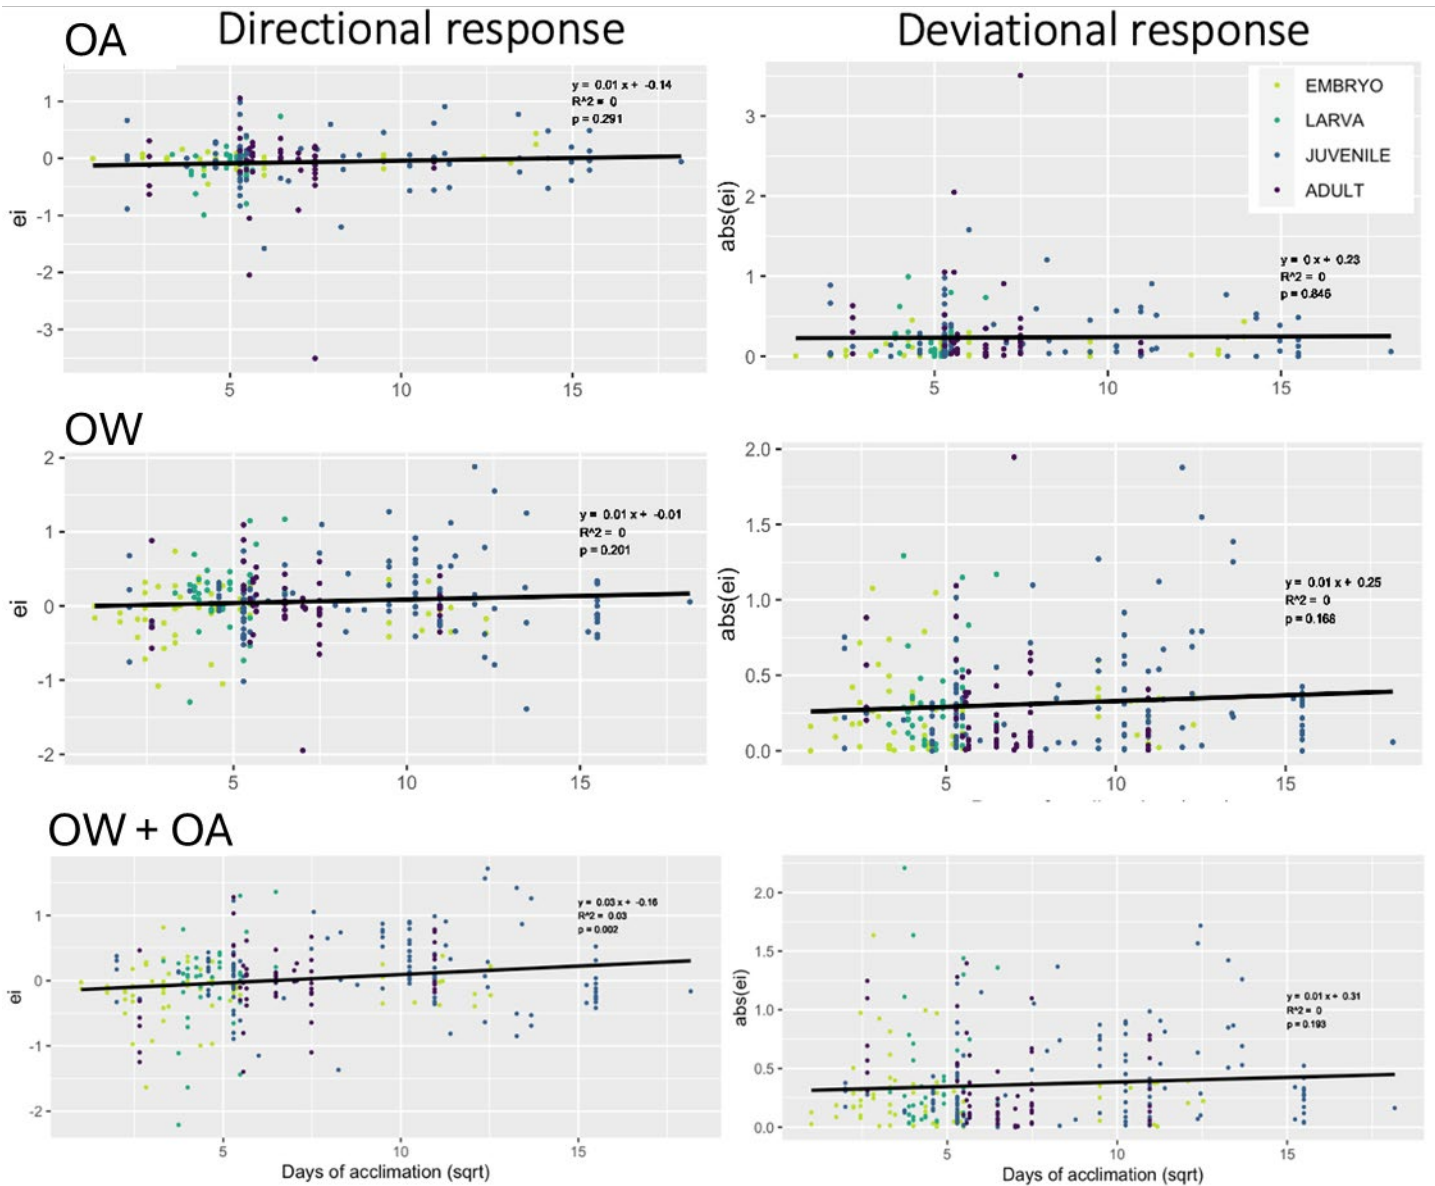

Supplementary Fig. 8: Effect of the number of acclimation days in experiments on the biological response of fish to climate drivers. Left plots display directional responses (lnRR) and right plots deviational responses (abs(lnRR)) to ocean acidification (OA; top panel), ocean warming (OW; middle panel) and their combination (OW + OA; bottom panel). The color of dots, which each represent the effect size associated with individual experiments, indicates the life stage of the organism tested (embryo, larva, juvenile, and adult). The intercept and the coefficient of the linear regression is indicated on plots, along with the R-squared and t p-value associated with the fit of the linear regression to the data set.



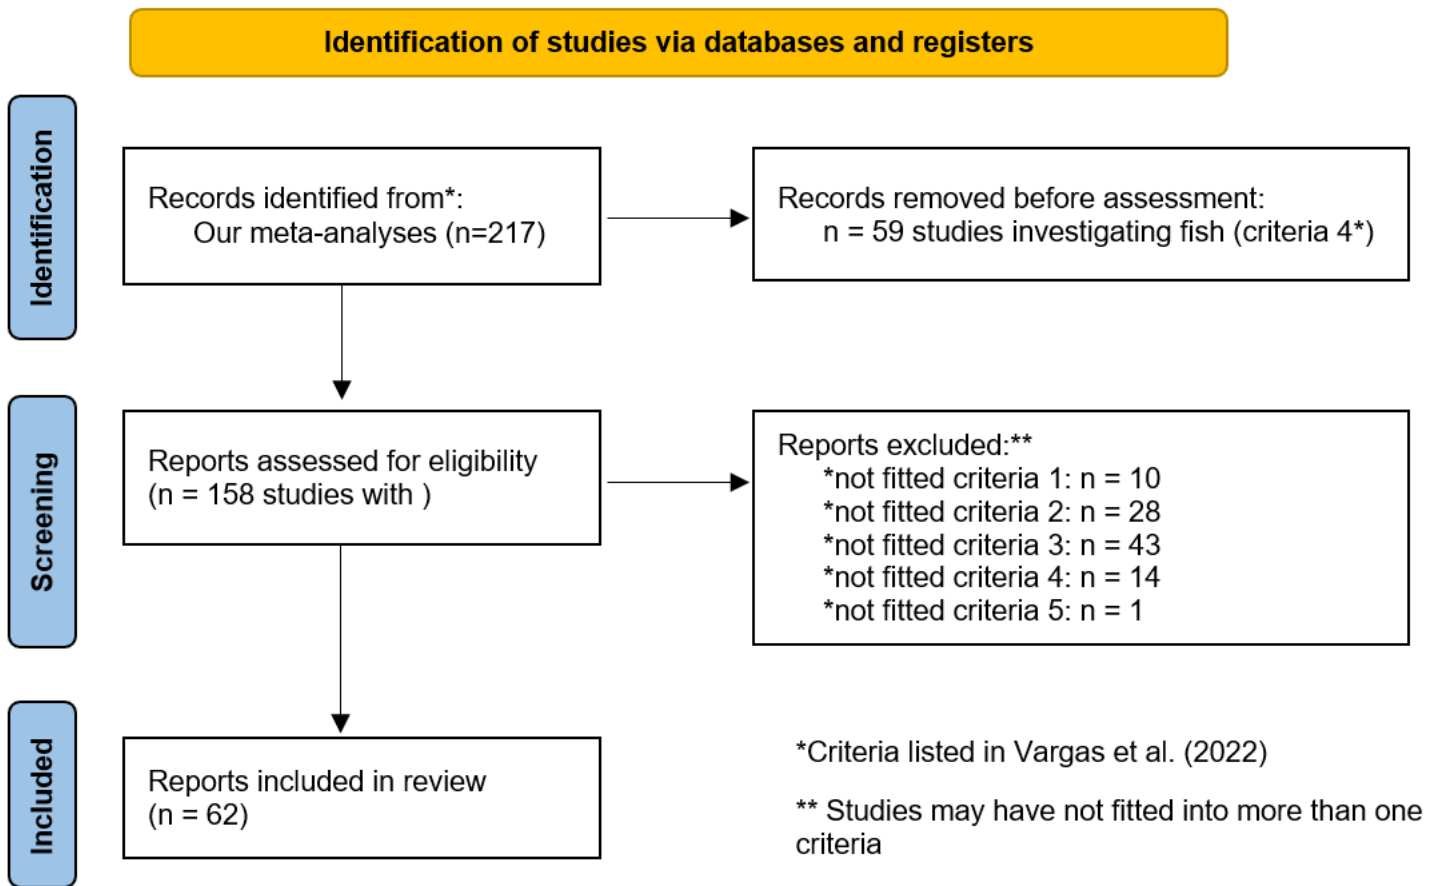

Supplementary Fig. 9: PRISMA flow diagram of the systematic review of the studies used in our meta-analyses against the selection criteria used in Vargas et al.<sup>46</sup>. This figure was based on the template provided in Page et al.<sup>59</sup>.

Supplementary Table 1: Model heterogeneity and residual heterogeneity associated with the effect of climate driver intensity level on the directional change (lnRR) of biological responses of fish and invertebrates (one-way ANOVA) to ocean warming (OW), ocean acidification (OA), and their combination (OW+OA).

| taxa         | biological response | driver | n    | Model heterogeneity |      |         | Residual heterogeneity |           |           |
|--------------|---------------------|--------|------|---------------------|------|---------|------------------------|-----------|-----------|
|              |                     |        |      | Qm                  | df   | p-value | Qe                     | df        | p-value   |
| fish         | Behavior            | OW     | 40   | 4.55                | 2    | 0.1     | 314                    | 37        | 1.18E-45  |
|              |                     | OA     | 35   | 2.72                | 2    | 0.26    | 265                    | 32        | 2.05E-38  |
|              |                     | OW+OA  | 45   | 3.84                | 2    | 0.15    | 319                    | 31        | 1.63E-49  |
|              | Development         | OW     | 19   | 0.01                | 2    | 1       | 1916                   | 16        | 0.00E+00  |
|              |                     | OA     | 15   | 1.39                | 2    | 0.5     | 1641                   | 12        | 0.00E+00  |
|              |                     | OW+OA  | 21   | 5.15                | 1    | 0.02    | 174                    | 6         | 3.69E-34  |
|              | Growth              | OW     | 64   | 0.53                | 2    | 0.77    | 3026                   | 61        | 0.00E+00  |
|              |                     | OW+OA  | 74   | 4.56                | 2    | 0.1     | 2786                   | 44        | 0.00E+00  |
|              |                     | OA     | 50   | 0.82                | 2    | 0.66    | 1083                   | 47        | 5.19E-196 |
|              | Metabolism          | OW     | 47   | 4.32                | 2    | 0.12    | 718                    | 44        | 9.88E-123 |
|              |                     | OA     | 34   | 8.84                | 1    | 0       | 331                    | 31        | 2.13E-51  |
|              |                     | OW+OA  | 50   | 1.44                | 1    | 0.23    | 443                    | 24        | 4.06E-78  |
|              | Physiology          | OW     | 72   | 0.63                | 2    | 0.73    | 952                    | 69        | 2.35E-155 |
|              |                     | OW+OA  | 78   | 0.29                | 2    | 0.87    | 619                    | 44        | 1.73E-102 |
|              |                     | OA     | 62   | 0.34                | 2    | 0.84    | 515                    | 59        | 5.05E-74  |
|              | Reproduction        | OW     | 7    | 0.68                | 1    | 0.41    | 48                     | 4         | 4.45E-09  |
|              |                     | OA     | 6    | 0.89                | 2    | 0.64    | 13                     | 3         | 3.99E-03  |
|              |                     | OW+OA  | 10   | NA                  | NA   | NA      | NA                     | NA        | NA        |
| Survival     | OW                  | 31     | 2.34 | 2                   | 0.31 | 588     | 28                     | 4.31E-106 |           |
|              | OA                  | 25     | 1.63 | 2                   | 0.44 | 897     | 22                     | 1.66E-175 |           |
|              | OW+OA               | 35     | 5.15 | 1                   | 0.02 | 2677    | 19                     | 0.00E+00  |           |
| invertebrate | Behavior            | OA     | 59   | 0.59                | 1    | 0.44    | 639                    | 22        | 2.87E-120 |
|              |                     | OW     | 46   | 0.39                | 2    | 0.82    | 363                    | 43        | 2.62E-52  |
|              |                     | OW+OA  | 48   | 6.07                | 2    | 0.05    | 1001                   | 45        | 1.76E-180 |
|              | Biomechanics        | OA     | 29   | 1.49                | 2    | 0.47    | 99                     | 26        | 1.65E-10  |
|              |                     | OW     | 23   | 1.87                | 2    | 0.39    | 200                    | 20        | 1.09E-31  |
|              |                     | OW+OA  | 33   | 1.99                | 1    | 0.16    | 123                    | 15        | 1.61E-18  |
|              | Biodiversity        | OA     | 9    | 0.65                | 1    | 0.42    | 21                     | 6         | 3.89E-03  |
|              |                     | OW+OA  | 9    | NA                  | NA   | NA      | NA                     | NA        | NA        |
|              |                     | OW     | 3    | NA                  | NA   | NA      | NA                     | NA        | NA        |
|              | Calcification       | OA     | 61   | 2.75                | 2    | 0.25    | 20412                  | 58        | 0.00E+00  |
|              |                     | OW     | 52   | 0.13                | 2    | 0.94    | 345                    | 49        | 3.34E-46  |
|              |                     | OW+OA  | 70   | 3.11                | 2    | 0.21    | 534                    | 33        | 1.10E-91  |
|              | Development         | OA     | 119  | 0.25                | 2    | 0.88    | 12967                  | 116       | 0.00E+00  |
|              |                     | OW     | 84   | 5.52                | 2    | 0.06    | 6258                   | 81        | 0.00E+00  |
|              |                     | OW+OA  | 154  | 7.2                 | 2    | 0.03    | 5188                   | 62        | 0.00E+00  |
|              | Growth              | OA     | 147  | 2.03                | 2    | 0.36    | 2710                   | 144       | 0.00E+00  |
|              |                     | OW     | 118  | 1.61                | 2    | 0.45    | 2462                   | 115       | 0.00E+00  |
|              |                     | OW+OA  | 190  | 2.11                | 2    | 0.35    | 2707                   | 76        | 0.00E+00  |
|              | Metabolism          | OA     | 54   | 2.45                | 2    | 0.29    | 194                    | 51        | 1.31E-18  |
|              |                     | OW     | 53   | 7.15                | 1    | 0.01    | 514                    | 50        | 8.47E-78  |
|              |                     | OW+OA  | 67   | 5.93                | 1    | 0.01    | 708                    | 39        | 5.05E-123 |
|              | Physiology          | OA     | 92   | 0.11                | 2    | 0.95    | 1941                   | 89        | 0.00E+00  |
|              |                     | OW     | 85   | 1.55                | 2    | 0.46    | 2300                   | 82        | 0.00E+00  |
|              |                     | OW+OA  | 104  | 0.35                | 1    | 0.55    | 825                    | 48        | 1.42E-141 |
|              | Reproduction        | OA     | 62   | 0.68                | 2    | 0.71    | 505                    | 59        | 4.55E-72  |
|              |                     | OW     | 59   | 0.21                | 2    | 0.9     | 659                    | 56        | 9.07E-104 |
|              |                     | OW+OA  | 111  | 1.33                | 2    | 0.51    | 102                    | 37        | 6.21E-08  |
| Survival     | OW+OA               | 125    | 0.47 | 2                   | 0.79 | 343     | 42                     | 7.74E-49  |           |
|              | OA                  | 115    | 7.21 | 2                   | 0.03 | 6936    | 112                    | 0.00E+00  |           |
|              | OW                  | 68     | 2.5  | 2                   | 0.29 | 755     | 65                     | 4.02E-118 |           |

Supplementary Table 2: Model heterogeneity and residual heterogeneity. Model heterogeneity and residual heterogeneity associated with the effect of life stage as a moderator of the biological responses of fish and invertebrates (one-way ANOVA) to ocean warming (OW), ocean acidification (OA) and their combination (OW+OA). p-values associated with significant results ( $QMp < 0.05$ ) are indicated in bold.

| analysis                          | taxa         | driver | QM         | QMdf | QMp               | QE         | QEdf | QEp |
|-----------------------------------|--------------|--------|------------|------|-------------------|------------|------|-----|
| Directional response<br>(lnRR)    | fish         | OA     | 2.1003983  | 3    | 0.55183219        | 11396.9693 | 227  | 0   |
|                                   |              | OW     | 14.3860911 | 3    | <b>0.00242406</b> | 29946.3318 | 281  | 0   |
|                                   |              | OW+OW  | 15.0562299 | 3    | <b>0.00176922</b> | 53172.7851 | 314  | 0   |
|                                   | invertebrate | OA     | 6.45616205 | 3    | 0.09140749        | 75672.452  | 731  | 0   |
|                                   |              | OW     | 13.2487218 | 3    | <b>0.00412847</b> | 20497.7892 | 590  | 0   |
|                                   |              | OW+OW  | 17.5273001 | 3    | <b>0.00055047</b> | 33796.1618 | 919  | 0   |
| Deviation response<br>(abs(lnRR)) | fish         | OA     | 13.7703962 | 3    | <b>0.00323494</b> | 8135.65184 | 227  | 0   |
|                                   |              | OW     | 3.95232246 | 3    | 0.26665868        | 17546.04   | 281  | 0   |
|                                   |              | OW+OW  | 5.99009039 | 3    | 0.11209335        | 33809.4588 | 314  | 0   |
|                                   | invertebrate | OA     | 9.02478119 | 3    | <b>0.02896322</b> | 68522.7863 | 731  | 0   |
|                                   |              | OW     | 15.3351718 | 3    | <b>0.00155151</b> | 16336.2081 | 590  | 0   |
|                                   |              | OW+OW  | 18.8614483 | 3    | <b>0.00029204</b> | 27462.4165 | 919  | 0   |

Supplementary Table 3: Results of the directional meta-analyses (lnRR) performed for each combination of taxa, driver, and biological response. Lower and upper confidence interval (CI) are the lower and upper boundaries of the 95% CI associated with the effect size ei. n is the number of values from which effect size was calculated. Qt is the between-study heterogeneity, df is the degree of freedom, and pQt is the p-value associated with this heterogeneity. OW = ocean warming, OA = ocean acidification.

| taxa         | biological response | driver  | n     | p-value | Lower CI | Upper CI | ei       | Qt        | df  | pQt   |
|--------------|---------------------|---------|-------|---------|----------|----------|----------|-----------|-----|-------|
| Fish         | Behavior            | OW      | 40    | 0.239   | -0.05    | 0.202    | 0.076    | 353.046   | 39  | 0     |
|              |                     | OA      | 35    | 0.392   | -0.231   | 0.091    | -0.07    | 264.816   | 34  | 0     |
|              |                     | OW + OA | 45    | 0.561   | -0.085   | 0.156    | 0.036    | 384.317   | 44  | 0     |
|              | Calcification       | OW      | 4     | 0.196   | -0.186   | 0.904    | 0.359    | 4107.23   | 3   | 0     |
|              |                     | OA      | 3     | 0.079   | -0.042   | 0.754    | 0.356    | 236.216   | 2   | 0     |
|              |                     | OW + OA | 4     | 0.066   | -0.037   | 1.179    | 0.571    | 5576.731  | 3   | 0     |
|              | Development         | OW      | 19    | 0.001   | -0.382   | -0.091   | -0.236   | 2632.517  | 18  | 0     |
|              |                     | OA      | 15    | 0.294   | -0.205   | 0.062    | -0.071   | 4690.182  | 14  | 0     |
|              |                     | OW + OA | 21    | 0       | -0.506   | -0.147   | -0.327   | 12571.384 | 20  | 0     |
|              | Growth              | OW      | 64    | 0.068   | -0.005   | 0.149    | 0.072    | 3256.741  | 63  | 0     |
|              |                     | OA      | 50    | 0.015   | -0.092   | -0.01    | -0.051   | 1125.523  | 49  | 0     |
|              |                     | OW + OA | 74    | 0.281   | -0.033   | 0.113    | 0.04     | 3449.385  | 73  | 0     |
|              | Metabolism          | OW      | 47    | 0       | 0.21     | 0.45     | 0.33     | 1088.218  | 46  | 0     |
|              |                     | OA      | 34    | 0.863   | -0.125   | 0.105    | -0.01    | 606.558   | 33  | 0     |
|              |                     | OW + OA | 50    | 0       | 0.138    | 0.446    | 0.292    | 983.115   | 49  | 0     |
|              | Physiology          | OW      | 72    | 0.204   | -0.025   | 0.119    | 0.047    | 991.018   | 71  | 0     |
|              |                     | OA      | 62    | 0.311   | -0.073   | 0.023    | -0.025   | 530.094   | 61  | 0     |
|              |                     | OW + OA | 78    | 0.609   | -0.064   | 0.109    | 0.022    | 964.585   | 77  | 0     |
| Reproduction | OW                  | 7       | 0.015 | -0.711  | -0.076   | -0.394   | 68.539   | 6         | 0   |       |
|              | OA                  | 6       | 0.8   | -0.25   | 0.324    | 0.037    | 29.865   | 5         | 0   |       |
|              | OW + OA             | 10      | 0.051 | -0.479  | 0.001    | -0.239   | 66.186   | 9         | 0   |       |
| Survival     | OW                  | 31      | 0.009 | -0.435  | -0.062   | -0.248   | 1325.228 | 30        | 0   |       |
|              | OA                  | 25      | 0.063 | -0.154  | 0.004    | -0.075   | 902.649  | 24        | 0   |       |
|              | OW + OA             | 35      | 0     | -0.614  | -0.188   | -0.401   | 3325.817 | 34        | 0   |       |
| Invertebrate | Behavior            | OW      | 48    | 0.638   | -0.117   | 0.19     | 0.037    | 1040.336  | 47  | 0     |
|              |                     | OA      | 46    | 0.007   | -0.376   | -0.059   | -0.218   | 385.259   | 45  | 0     |
|              |                     | OW + OA | 59    | 0.621   | -0.097   | 0.163    | 0.033    | 1338.354  | 58  | 0     |
|              | Biomechanics        | OW      | 3     | 0.425   | -0.145   | 0.344    | 0.1      | 6.605     | 2   | 0.037 |
|              |                     | OA      | 9     | 0.387   | -0.24    | 0.093    | -0.073   | 21.655    | 8   | 0.006 |
|              |                     | OW + OA | 9     | 0.267   | -0.337   | 0.093    | -0.122   | 66.78     | 8   | 0     |
|              | Biodiversity        | OW      | 23    | 0.214   | -0.231   | 0.052    | -0.089   | 212.164   | 22  | 0     |
|              |                     | OA      | 29    | 0.016   | -0.166   | -0.017   | -0.092   | 154.099   | 28  | 0     |
|              |                     | OW + OA | 33    | 0.022   | -0.267   | -0.021   | -0.144   | 391.237   | 32  | 0     |
|              | Calcification       | OW      | 52    | 0.081   | -0.01    | 0.175    | 0.083    | 389.023   | 51  | 0     |
|              |                     | OA      | 61    | 0.002   | -0.332   | -0.075   | -0.204   | 34599.72  | 60  | 0     |
|              |                     | OW + OA | 70    | 0.02    | -0.249   | -0.021   | -0.135   | 1317.046  | 69  | 0     |
|              | Development         | OW      | 84    | 0.065   | -0.256   | 0.008    | -0.124   | 9353.035  | 83  | 0     |
|              |                     | OA      | 119   | 0.001   | -0.258   | -0.064   | -0.161   | 13289.426 | 118 | 0     |
|              |                     | OW + OA | 154   | 0       | -0.392   | -0.163   | -0.278   | 12865.201 | 153 | 0     |
|              | Growth              | OW      | 118   | 0.185   | -0.026   | 0.135    | 0.055    | 2507.029  | 117 | 0     |
|              |                     | OA      | 147   | 0       | -0.158   | -0.067   | -0.112   | 2878.22   | 146 | 0     |
|              |                     | OW + OA | 190   | 0.001   | -0.171   | -0.045   | -0.108   | 5880.285  | 189 | 0     |
|              | Metabolism          | OW      | 53    | 0       | 0.226    | 0.494    | 0.36     | 598.835   | 52  | 0     |
|              |                     | OA      | 54    | 0.258   | -0.035   | 0.132    | 0.048    | 199.093   | 53  | 0     |
|              |                     | OW + OA | 67    | 0       | 0.296    | 0.572    | 0.434    | 1112.483  | 66  | 0     |
|              | Physiology          | OW      | 85    | 0.148   | -0.203   | 0.03     | -0.086   | 2371.551  | 84  | 0     |
|              |                     | OA      | 92    | 0.559   | -0.116   | 0.063    | -0.027   | 2016.32   | 91  | 0     |
|              |                     | OW + OA | 104   | 0.452   | -0.145   | 0.064    | -0.04    | 2937.69   | 103 | 0     |
|              | Reproduction        | OW      | 59    | 0.084   | -0.148   | 0.009    | -0.069   | 665.108   | 58  | 0     |
|              |                     | OA      | 62    | 0.01    | -0.236   | -0.031   | -0.134   | 506.409   | 61  | 0     |
|              |                     | OW + OA | 111   | 0       | -0.226   | -0.083   | -0.154   | 1075.464  | 110 | 0     |
| Survival     | OW                  | 68      | 0.046 | -0.23   | -0.002   | -0.116   | 790.588  | 67        | 0   |       |
|              | OA                  | 115     | 0     | -0.247  | -0.105   | -0.176   | 7243.232 | 114       | 0   |       |
|              | OW + OA             | 125     | 0     | -0.375  | -0.149   | -0.262   | 2605.915 | 124       | 0   |       |

Supplementary Table 4: Results of the deviation meta-analyses (abs(lnRR)) performed for each combination of taxa, driver, and biological response. Lower and upper confidence interval (CI) are the lower and upper boundaries of the 95% CI associated with the effect size  $e_i$ .  $n$  is the number of values from which effect size was calculated.  $Q_t$  is the between-study heterogeneity,  $df$  is the degree of freedom, and  $p_{Q_t}$  is the p-value associated with this heterogeneity. OW = ocean warming, OA = ocean acidification.

| taxa         | biological response | driver  | n     | p-value | lower CI | upper CI | $e_i$    | $Q_t$     | df    | $p_{Q_t}$ |
|--------------|---------------------|---------|-------|---------|----------|----------|----------|-----------|-------|-----------|
| Fish         | Behavior            | OW      | 40    | 0.000   | 0.200    | 0.363    | 0.281    | 154.413   | 39    | 0.000     |
|              |                     | OA      | 35    | 0.000   | 0.194    | 0.427    | 0.310    | 172.685   | 34    | 0.000     |
|              |                     | OW + OA | 45    | 0.000   | 0.217    | 0.359    | 0.288    | 142.483   | 44    | 0.000     |
|              | Calcification       | OW      | 4     | 0.185   | -0.175   | 0.905    | 0.365    | 4058.259  | 3     | 0.000     |
|              |                     | OA      | 3     | 0.079   | -0.042   | 0.754    | 0.356    | 236.216   | 2     | 0.000     |
|              |                     | OW + OA | 4     | 0.066   | -0.037   | 1.179    | 0.571    | 5576.731  | 3     | 0.000     |
|              | Development         | OW      | 19    | 0.000   | 0.131    | 0.399    | 0.265    | 2514.872  | 18    | 0.000     |
|              |                     | OA      | 15    | 0.009   | 0.037    | 0.266    | 0.152    | 4180.058  | 14    | 0.000     |
|              |                     | OW + OA | 21    | 0.000   | 0.204    | 0.530    | 0.367    | 11505.420 | 20    | 0.000     |
|              | Growth              | OW      | 64    | 0.000   | 0.142    | 0.262    | 0.202    | 1949.847  | 63    | 0.000     |
|              |                     | OA      | 50    | 0.000   | 0.054    | 0.125    | 0.089    | 975.592   | 49    | 0.000     |
|              |                     | OW + OA | 74    | 0.000   | 0.161    | 0.265    | 0.213    | 1633.971  | 73    | 0.000     |
|              | Metabolism          | OW      | 47    | 0.000   | 0.320    | 0.501    | 0.411    | 896.096   | 46    | 0.000     |
|              |                     | OA      | 34    | 0.000   | 0.174    | 0.316    | 0.245    | 272.869   | 33    | 0.000     |
|              |                     | OW + OA | 50    | 0.000   | 0.359    | 0.575    | 0.467    | 773.317   | 49    | 0.000     |
|              | Physiology          | OW      | 72    | 0.000   | 0.164    | 0.264    | 0.214    | 673.650   | 71    | 0.000     |
|              |                     | OA      | 62    | 0.000   | 0.084    | 0.159    | 0.121    | 411.529   | 61    | 0.000     |
|              |                     | OW + OA | 78    | 0.000   | 0.206    | 0.325    | 0.266    | 690.083   | 77    | 0.000     |
|              | Reproduction        | OW      | 7     | 0.015   | 0.076    | 0.711    | 0.394    | 68.539    | 6     | 0.000     |
|              |                     | OA      | 6     | 0.060   | -0.005   | 0.273    | 0.134    | 29.372    | 5     | 0.000     |
|              |                     | OW + OA | 10    | 0.001   | 0.142    | 0.546    | 0.344    | 64.343    | 9     | 0.000     |
| Survival     | OW                  | 31      | 0.000 | 0.227   | 0.535    | 0.381    | 1225.577 | 30        | 0.000 |           |
|              | OA                  | 25      | 0.000 | 0.058   | 0.197    | 0.127    | 882.205  | 24        | 0.000 |           |
|              | OW + OA             | 35      | 0.000 | 0.332   | 0.700    | 0.516    | 3243.957 | 34        | 0.000 |           |
| Invertebrate | Behavior            | OW      | 40    | 0.000   | 0.287    | 0.484    | 0.385    | 589.977   | 47    | 0.000     |
|              |                     | OA      | 40    | 0.000   | 0.271    | 0.502    | 0.386    | 255.778   | 45    | 0.000     |
|              |                     | OW + OA | 49    | 0.000   | 0.282    | 0.452    | 0.367    | 754.881   | 58    | 0.000     |
|              | Biomechanics        | OW      | 18    | 0.005   | 0.056    | 0.325    | 0.190    | 0.726     | 2     | 0.696     |
|              |                     | OA      | 23    | 0.000   | 0.082    | 0.275    | 0.178    | 8.896     | 8     | 0.351     |
|              |                     | OW + OA | 24    | 0.006   | 0.066    | 0.403    | 0.234    | 38.638    | 8     | 0.000     |
|              | Biodiversity        | OW      | 3     | 0.000   | 0.156    | 0.341    | 0.249    | 153.510   | 22    | 0.000     |
|              |                     | OA      | 9     | 0.000   | 0.105    | 0.221    | 0.163    | 132.988   | 28    | 0.000     |
|              |                     | OW + OA | 9     | 0.000   | 0.183    | 0.361    | 0.272    | 325.220   | 32    | 0.000     |
|              | Calcification       | OW      | 43    | 0.000   | 0.163    | 0.296    | 0.229    | 294.945   | 51    | 0.000     |
|              |                     | OA      | 51    | 0.000   | 0.221    | 0.450    | 0.335    | 32083.800 | 60    | 0.000     |
|              |                     | OW + OA | 56    | 0.000   | 0.254    | 0.431    | 0.343    | 885.197   | 69    | 0.000     |
|              | Development         | OW      | 72    | 0.000   | 0.277    | 0.489    | 0.383    | 7911.451  | 83    | 0.000     |
|              |                     | OA      | 108   | 0.000   | 0.176    | 0.357    | 0.266    | 12212.950 | 118   | 0.000     |
|              |                     | OW + OA | 129   | 0.000   | 0.400    | 0.581    | 0.491    | 9752.666  | 153   | 0.000     |
|              | Growth              | OW      | 92    | 0.000   | 0.217    | 0.341    | 0.279    | 1853.062  | 117   | 0.000     |
|              |                     | OA      | 124   | 0.000   | 0.151    | 0.227    | 0.189    | 2634.171  | 146   | 0.000     |
|              |                     | OW + OA | 148   | 0.000   | 0.230    | 0.332    | 0.281    | 5123.488  | 189   | 0.000     |
|              | Metabolism          | OW      | 41    | 0.000   | 0.346    | 0.568    | 0.457    | 380.680   | 52    | 0.000     |
|              |                     | OA      | 41    | 0.000   | 0.169    | 0.273    | 0.221    | 94.032    | 53    | 0.000     |
|              |                     | OW + OA | 51    | 0.000   | 0.418    | 0.655    | 0.536    | 828.539   | 66    | 0.000     |
| Physiology   | OW                  | 77      | 0.000 | 0.233   | 0.421    | 0.327    | 2181.863 | 84        | 0.000 |           |
|              | OA                  | 82      | 0.000 | 0.190   | 0.332    | 0.261    | 1651.435 | 91        | 0.000 |           |
|              | OW + OA             | 94      | 0.000 | 0.257   | 0.414    | 0.335    | 2355.827 | 103       | 0.000 |           |
| Reproduction | OW                  | 52      | 0.000 | 0.103   | 0.231    | 0.167    | 552.694  | 58        | 0.000 |           |
|              | OA                  | 55      | 0.000 | 0.099   | 0.281    | 0.190    | 445.037  | 61        | 0.000 |           |
|              | OW + OA             | 92      | 0.000 | 0.140   | 0.273    | 0.206    | 953.802  | 110       | 0.000 |           |
| Survival     | OW                  | 64      | 0.000 | 0.199   | 0.396    | 0.297    | 727.443  | 67        | 0.000 |           |
|              | OA                  | 110     | 0.000 | 0.198   | 0.319    | 0.258    | 5686.556 | 114       | 0.000 |           |
|              | OW + OA             | 120     | 0.000 | 0.359   | 0.530    | 0.445    | 2454.179 | 124       | 0.000 |           |

Supplementary Table 5: Model heterogeneity and residual heterogeneity. Model heterogeneity and residual heterogeneity associated with the effect of climate driver intensity level on the deviation in biological responses of fish and invertebrates (one-way ANOVA) to ocean warming (OW), ocean acidification (OA), and their combination (OW+OA).

| taxa         | biological response | driver | n    | Model heterogeneity |      |         | Residual heterogeneity |           |           |
|--------------|---------------------|--------|------|---------------------|------|---------|------------------------|-----------|-----------|
|              |                     |        |      | Qm                  | df   | p-value | Qe                     | df        | p-value   |
| Fish         | Behavior            | OW     | 40   | 1.05                | 2    | 0.59    | 154                    | 37        | 3.35E-16  |
|              |                     | OA     | 35   | 4.09                | 2    | 0.13    | 168                    | 32        | 2.44E-20  |
|              |                     | OW+OA  | 45   | 0.46                | 2    | 0.8     | 128                    | 31        | 8.24E-14  |
|              | Development         | OW     | 19   | 0.17                | 2    | 0.92    | 1836                   | 16        | 0.00E+00  |
|              |                     | OA     | 15   | 0.91                | 2    | 0.64    | 1539                   | 12        | 1.24e-322 |
|              |                     | OW+OA  | 21   | 5.15                | 1    | 0.02    | 174                    | 6         | 3.69E-34  |
|              | Growth              | OW     | 64   | 2.49                | 2    | 0.29    | 1710                   | 61        | 3.06e-317 |
|              |                     | OW+OA  | 74   | 0.14                | 2    | 0.93    | 1206                   | 44        | 5.13E-224 |
|              |                     | OA     | 50   | 2.71                | 2    | 0.26    | 947                    | 47        | 5.74E-168 |
|              | Metabolism          | OW     | 47   | 3.78                | 2    | 0.15    | 503                    | 44        | 3.53E-79  |
|              |                     | OA     | 34   | 0.15                | 1    | 0.7     | 270                    | 31        | 1.76E-39  |
|              |                     | OW+OA  | 50   | 2.26                | 1    | 0.13    | 186                    | 24        | 1.32E-26  |
|              | Physiology          | OW     | 72   | 0.49                | 2    | 0.78    | 672                    | 69        | 1.10E-99  |
|              |                     | OW+OA  | 78   | 0.57                | 2    | 0.75    | 340                    | 44        | 1.94E-47  |
|              |                     | OA     | 62   | 0.79                | 2    | 0.67    | 397                    | 59        | 1.34E-51  |
|              | Reproduction        | OW     | 7    | 0.68                | 1    | 0.41    | 48                     | 4         | 4.45E-09  |
|              |                     | OA     | 6    | 1.28                | 2    | 0.53    | 9                      | 3         | 2.62E-02  |
|              |                     | OW+OA  | 10   | NA                  | NA   | NA      | NA                     | NA        | NA        |
| Survival     | OW                  | 31     | 10.2 | 2                   | 0.01 | 542     | 28                     | 1.17E-96  |           |
|              | OA                  | 25     | 0.8  | 2                   | 0.67 | 879     | 22                     | 8.78E-172 |           |
|              | OW+OA               | 35     | 3.83 | 1                   | 0.05 | 2629    | 19                     | 0.00E+00  |           |
| Invertebrate | Behavior            | OA     | 59   | 0.44                | 1    | 0.51    | 256                    | 22        | 3.60E-41  |
|              |                     | OW     | 46   | 0.18                | 2    | 0.91    | 204                    | 43        | 8.20E-23  |
|              |                     | OW+OA  | 48   | 7                   | 2    | 0.03    | 249                    | 45        | 5.58E-30  |
|              | Biomechanics        | OA     | 29   | 4.88                | 2    | 0.09    | 64                     | 26        | 5.48E-05  |
|              |                     | OW     | 23   | 1.42                | 2    | 0.49    | 146                    | 20        | 4.19E-21  |
|              |                     | OW+OA  | 33   | 6.02                | 1    | 0.01    | 62                     | 15        | 2.08E-07  |
|              | Biodiversity        | OA     | 9    | 1.91                | 1    | 0.17    | 7                      | 6         | 4.31E-01  |
|              |                     | OW+OA  | 9    | NA                  | NA   | NA      | NA                     | NA        | NA        |
|              |                     | OW     | 3    | NA                  | NA   | NA      | NA                     | NA        | NA        |
|              | Calcification       | OA     | 61   | 3.25                | 2    | 0.2     | 17735                  | 58        | 0.00E+00  |
|              |                     | OW     | 52   | 0.2                 | 2    | 0.9     | 228                    | 49        | 6.41E-25  |
|              |                     | OW+OA  | 70   | 4.26                | 2    | 0.12    | 471                    | 33        | 5.32E-79  |
|              | Development         | OA     | 119  | 0.01                | 2    | 1       | 12210                  | 116       | 0.00E+00  |
|              |                     | OW     | 84   | 3.41                | 2    | 0.18    | 5221                   | 81        | 0.00E+00  |
|              |                     | OW+OA  | 154  | 3.29                | 2    | 0.19    | 4567                   | 62        | 0.00E+00  |
|              | Growth              | OA     | 147  | 0.07                | 2    | 0.97    | 2516                   | 144       | 0.00E+00  |
|              |                     | OW     | 118  | 11.92               | 2    | 0       | 1831                   | 115       | 1.05E-306 |
|              |                     | OW+OA  | 190  | 2.9                 | 2    | 0.23    | 2400                   | 76        | 0.00E+00  |
|              | Metabolism          | OA     | 54   | 0.38                | 2    | 0.83    | 86                     | 51        | 1.64E-03  |
|              |                     | OW     | 53   | 4.42                | 1    | 0.04    | 349                    | 50        | 5.02E-46  |
|              |                     | OW+OA  | 67   | 6.06                | 1    | 0.01    | 517                    | 39        | 3.11E-84  |
|              | Physiology          | OA     | 92   | 2.24                | 2    | 0.33    | 1644                   | 89        | 1.54E-284 |
|              |                     | OW     | 85   | 1.55                | 2    | 0.46    | 2174                   | 82        | 0.00E+00  |
|              |                     | OW+OA  | 104  | 0.78                | 1    | 0.38    | 677                    | 48        | 2.14E-111 |
|              | Reproduction        | OA     | 62   | 3.77                | 2    | 0.15    | 442                    | 59        | 3.89E-60  |
|              |                     | OW     | 59   | 3.49                | 2    | 0.18    | 534                    | 56        | 4.24E-79  |
|              |                     | OW+OA  | 111  | 1.49                | 2    | 0.47    | 85                     | 37        | 1.34E-05  |
|              | Survival            | OW+OA  | 125  | 4.33                | 2    | 0.11    | 304                    | 42        | 2.00E-41  |
|              |                     | OA     | 115  | 9.03                | 2    | 0.01    | 5190                   | 112       | 0.00E+00  |
|              |                     | OW     | 68   | 5.94                | 2    | 0.05    | 694                    | 65        | 4.78E-106 |

Supplementary Table 6: Sensitivity analyses. Rosenthal safe number, associated Rosenthal threshold, trim and fill p-value and original p-value associated with significant directional effect sizes (lnRR). OW = ocean warming, OA = ocean acidification.

| taxa         | biological response | driver | Rosenthal number | threshold | original p-value | trim p-value |
|--------------|---------------------|--------|------------------|-----------|------------------|--------------|
| fish         | Development         | OW     | 9934             | 105       | 0.001            | 0.001        |
|              |                     | OW+OA  | 23357            | 115       | 0.000            | 0.000        |
|              | Growth              | OA     | 2242             | 260       | 0.015            | 0.015        |
|              | Metabolism          | OW     | 24009            | 245       | 0.000            | 0.000        |
|              |                     | OW+OA  | 8360             | 260       | 0.000            | 0.000        |
|              | Reproduction        | OW     | 102              | 45        | 0.015            | 0.015        |
|              | Survival            | OW     | 11983            | 165       | 0.009            | 0.009        |
|              |                     | OW+OA  | 45688            | 185       | 0.000            | 0.000        |
| invertebrate | Behavior            | OA     | 1196             | 240       | 0.007            | 0.007        |
|              | Biomechanics        | OA     | 350              | 155       | 0.016            | 0.002        |
|              |                     | OW+OA  | 846              | 175       | 0.022            | 0.022        |
|              | Calcification       | OA     | 29589            | 315       | 0.002            | 0.000        |
|              |                     | OW+OA  | 2151             | 360       | 0.020            | 0.020        |
|              | Development         | OA     | 18217            | 605       | 0.001            | 0.001        |
|              |                     | OW+OA  | 117531           | 780       | 0.000            | 0.000        |
|              | Growth              | OA     | 33580            | 745       | 0.000            | 0.000        |
|              |                     | OW+OA  | 43172            | 960       | 0.001            | 0.001        |
|              | Metabolism          | OA     | 6725             | 275       | 0.000            | 0.000        |
|              |                     | OW+OA  | 13954            | 345       | 0.000            | 0.000        |
|              | Reproduction        | OW     | 2422             | 320       | 0.010            | 0.010        |
|              |                     | OW+OA  | 12853            | 565       | 0.000            | 0.000        |
|              | Survival            | OW     | 3352             | 350       | 0.046            | 0.001        |
|              |                     | OA     | 14050            | 585       | 0.000            | 0.000        |
| OW+OA        |                     | 29322  | 635              | 0.000     | 0.000            |              |

Supplementary Table 7: Additional benthic species. Collection sites of additional sessile and gregarious or low-vagility benthic invertebrate species added to those used in Vargas et al.<sup>46</sup>.

|                                    | <b>Species</b>                   | <b>Collection site</b>              |
|------------------------------------|----------------------------------|-------------------------------------|
| Oysters                            | <i>Ostrea edulis</i>             | low intertidal                      |
| Gastropods                         | <i>Austrocochlea concamerata</i> | low intertidal                      |
|                                    | <i>Littorina littorea</i>        | intertidal                          |
|                                    | <i>Phasianella australis</i>     | 5-10 m depth                        |
|                                    | <i>Rissoa interrupta</i>         | low intertidal and shallow subtidal |
|                                    | <i>Rissoa parva</i>              | low intertidal and shallow subtidal |
|                                    | <i>Stylocheilus striatus</i>     | low intertidal and shallow subtidal |
|                                    | <i>Thalotia conica</i>           | 1-2 m depth                         |
|                                    | Crustaceans                      | <i>Calliopius laeviusculus</i>      |
| <i>Echinogammarus marinus</i>      |                                  | intertidal                          |
| <i>Elminius modestus</i>           |                                  | intertidal                          |
| <i>Gammarus locusta</i>            |                                  | 1-5 m depth                         |
| <i>Hyas araneus</i>                |                                  | 7-12 m depth                        |
| <i>Menippe mercenaria (larvae)</i> |                                  | surface water                       |
| <i>Peramphithoe parmerong</i>      |                                  | 1-3 m depth                         |
| <i>Semibalanus balanoides</i>      |                                  | intertidal                          |
| <i>Stenothoe monoculoides</i>      |                                  | intertidal                          |
| Corals                             |                                  | <i>Fungia fungites</i>              |
|                                    | <i>Lithophyllon repanda</i>      | 1-30 m depth                        |
|                                    | <i>Pocillopora damicornis</i>    | 1-2 m depth                         |
| Mussels                            | <i>Scrobicularia plana</i>       | intertidal                          |
| Moss animals                       | <i>Celleporaria nodulosa</i>     | 1-3 m depth                         |
| Sponge                             | <i>Aphrocallistes vastus</i>     | scuba dive site                     |
| Worms                              | <i>Platynereis dumerilii</i>     | low intertidal and shallow subtidal |



Supplementary Table 8: Model heterogeneity and residual heterogeneity associated with the effect of climate driver intensity level on the biological responses of invertebrates to ocean acidification. Climate driver intensity levels were determined either using the experimental minus the control partial pressure of carbon dioxide ( $p\text{CO}_2$ ; intensity = experimental – control  $p\text{CO}_2$ ) as given in publications (top part of the table) or using an intensity index according to Vargas et al.<sup>46</sup> for which the experimental  $p\text{CO}_2$  is subtracted from the upper extreme local environmental  $p\text{CO}_2$  (intensity = experimental – extreme local environmental  $p\text{CO}_2$ ; bottom part of the table).

|                                                                                         | <b>biological response</b> | <b>Qm</b> | <b>df (Qm)</b> | <b>p-value (Qm)</b> | <b>Qe</b> | <b>df (Qe)</b> | <b>p-value (Qe)</b> |
|-----------------------------------------------------------------------------------------|----------------------------|-----------|----------------|---------------------|-----------|----------------|---------------------|
| <b>Intensity = experimental – control <math>p\text{CO}_2</math> value</b>               |                            |           |                |                     |           |                |                     |
| directional response (lnRR)                                                             | Survival                   | 5.73      | 1              | 0.017               | 148.88    | 37             | 0.000               |
|                                                                                         | Biomechanics               | 3.90      | 2              | 0.142               | 27.17     | 13             | 0.004               |
|                                                                                         | Behavior                   | 0.26      | 2              | 0.879               | 165.01    | 18             | 0.000               |
|                                                                                         | Calcification              | 0.32      | 2              | 0.851               | 165.41    | 25             | 0.000               |
|                                                                                         | Development                | 0.84      | 2              | 0.657               | 487.40    | 20             | 0.000               |
|                                                                                         | Growth                     | 5.46      | 2              | 0.065               | 1150.24   | 56             | 0.000               |
|                                                                                         | Physiology                 | 4.78      | 2              | 0.091               | 448.82    | 30             | 0.000               |
|                                                                                         | Reproduction               | 11.11     | 2              | 0.004               | 12.29     | 9              | 0.091               |
|                                                                                         | Metabolism                 | 3.25      | 2              | 0.197               | 34.88     | 14             | 0.000               |
| deviation response (abs(lnRR))                                                          | Survival                   | 2.66      | 1              | 0.103               | 133.16    | 37             | 0.000               |
|                                                                                         | Biomechanics               | 9.34      | 2              | 0.009               | 15.83     | 13             | 0.147               |
|                                                                                         | Behavior                   | 14.48     | 2              | 0.001               | 23.06     | 18             | 0.112               |
|                                                                                         | Calcification              | 0.50      | 2              | 0.778               | 68.92     | 25             | 0.000               |
|                                                                                         | Development                | 0.49      | 2              | 0.782               | 478.69    | 20             | 0.000               |
|                                                                                         | Growth                     | 0.52      | 2              | 0.770               | 1078.34   | 56             | 0.000               |
|                                                                                         | Physiology                 | 3.68      | 2              | 0.159               | 388.51    | 30             | 0.000               |
|                                                                                         | Reproduction               | 7.50      | 2              | 0.024               | 11.40     | 9              | 0.122               |
|                                                                                         | Metabolism                 | 0.24      | 2              | 0.889               | 17.15     | 14             | 0.144               |
| <b>intensity = experimental – extreme local environmental <math>p\text{CO}_2</math></b> |                            |           |                |                     |           |                |                     |
| directional response (lnRR)                                                             | Survival                   | 1.20      | 2              | 0.549               | 148.92    | 37             | 0.000               |
|                                                                                         | Biomechanics               | 3.15      | 2              | 0.207               | 37.31     | 13             | 0.000               |
|                                                                                         | Behavior                   | 0.07      | 2              | 0.965               | 139.55    | 18             | 0.000               |
|                                                                                         | Calcification              | 1.07      | 2              | 0.584               | 134.85    | 25             | 0.000               |
|                                                                                         | Development                | 2.03      | 2              | 0.362               | 489.94    | 20             | 0.000               |
|                                                                                         | Growth                     | 2.10      | 2              | 0.350               | 876.02    | 56             | 0.000               |
|                                                                                         | Physiology                 | 3.60      | 2              | 0.165               | 450.24    | 30             | 0.000               |
|                                                                                         | Reproduction               | 3.63      | 2              | 0.163               | 16.89     | 9              | 0.018               |
|                                                                                         | Metabolism                 | 0.50      | 2              | 0.778               | 44.22     | 14             | 0.000               |
| deviation response (abs(lnRR))                                                          | Biomechanics               | 2.23      | 2              | 0.328               | 24.41     | 13             | 0.011               |
|                                                                                         | Behavior                   | 2.36      | 2              | 0.307               | 36.84     | 18             | 0.002               |
|                                                                                         | Calcification              | 1.51      | 2              | 0.469               | 83.76     | 25             | 0.000               |
|                                                                                         | Development                | 2.30      | 2              | 0.317               | 481.94    | 20             | 0.000               |
|                                                                                         | Growth                     | 5.46      | 2              | 0.065               | 779.60    | 56             | 0.000               |
|                                                                                         | Physiology                 | 2.24      | 2              | 0.326               | 391.93    | 30             | 0.000               |
|                                                                                         | Reproduction               | 1.07      | 2              | 0.585               | 16.64     | 9              | 0.020               |
|                                                                                         | Metabolism                 | 2.03      | 2              | 0.363               | 15.56     | 14             | 0.212               |
