# Supplementary material for: Hidden impacts of ocean warming and acidification on biological responses of marine animals revealed through meta-analysis
Source: PubMed Central journal article supplement (PMC10991405; doi:10.1038/s41467-024-47064-3), 2024-04-03
Supplement: 41467_2024_47064_MOESM3_ESM.pdf [file 41467_2024_47064_MOESM3_ESM.pdf]

## Description of Additional Supplementary Files

**Supplementary Data 1:** Forest plots and funnel plots associated with the meta-analyses models tested in this study.

**Supplementary Data 2:** Choice of metrics selected in the meta-analysis when multiple metrics falling under the same biological response category were measured in one study. Studies in which only one metric per category was measured are not listed.

**Supplementary Data 3:** Classification of metrics into the ten categories of biological responses considered, and into the three categories of effects of a metric's increase on fitness (positive, negative, or ambiguous).

**Supplementary Data 4:** Experts' votes on the effect of a metric's increase on animal fitness. Based on the expertise of five co-authors, metrics were classified according to whether an increase in that metrics' value was considered beneficial (1), detrimental (-1), ambiguous (0), or unknown (NA).

**Supplementary Data 5:** Summary statistics associated with the meta-analyses on the directional change in biological responses of fish and invertebrates to different intensity levels of ocean warming (OW), ocean acidification (OA) and their combination (OW + OA). Values provided are the p-value, degree of freedom (df), between-study heterogeneity (Qt), and p-value associated with between-study heterogeneity (pQt), for each calculated effect size shown in Figure 5.

**Supplementary Data 6:** Summary statistics associated with the meta-analyses on the deviation change in biological responses of fish and invertebrates to different intensity levels of ocean warming (OW), ocean acidification (OA) and their combination (OW + OA). Values provided are the p-value, degree of freedom (df), between-study heterogeneity (Qt), and p-value associated with between-study heterogeneity (pQt), for each calculated effect size shown in Figure 7.
